# Supplementary material for: Acquired αSMA Expression in Pericytes Coincides with Aberrant Vascular Structure and Function in Pancreatic Ductal Adenocarcinoma
Source: MDPI journal article supplement (doi:10.3390/cancers14102448), 2022-05-16
Supplement: s1 [file s1]

**SUPPLEMENTARY FIGURES AND TABLE**

Figure 1S. PDAC associated pericytes exhibit aberrant molecular phenotype

Figure S2. Perivascular composition of PDAC tumor tissues

Figure S3.  $\alpha$ SMA<sup>+</sup> pericytes progressively appear on KPC tumors at different stages

Figure S4.  $\alpha$ SMA<sup>+</sup> pericytes coverage is correlated with hypoxia in PDAC tumors

Figure S5. Pericytes phenotype is influenced by pancreatic cancer cell-derived exosomes

Table S1. Primer sequences used for qRT-PCR

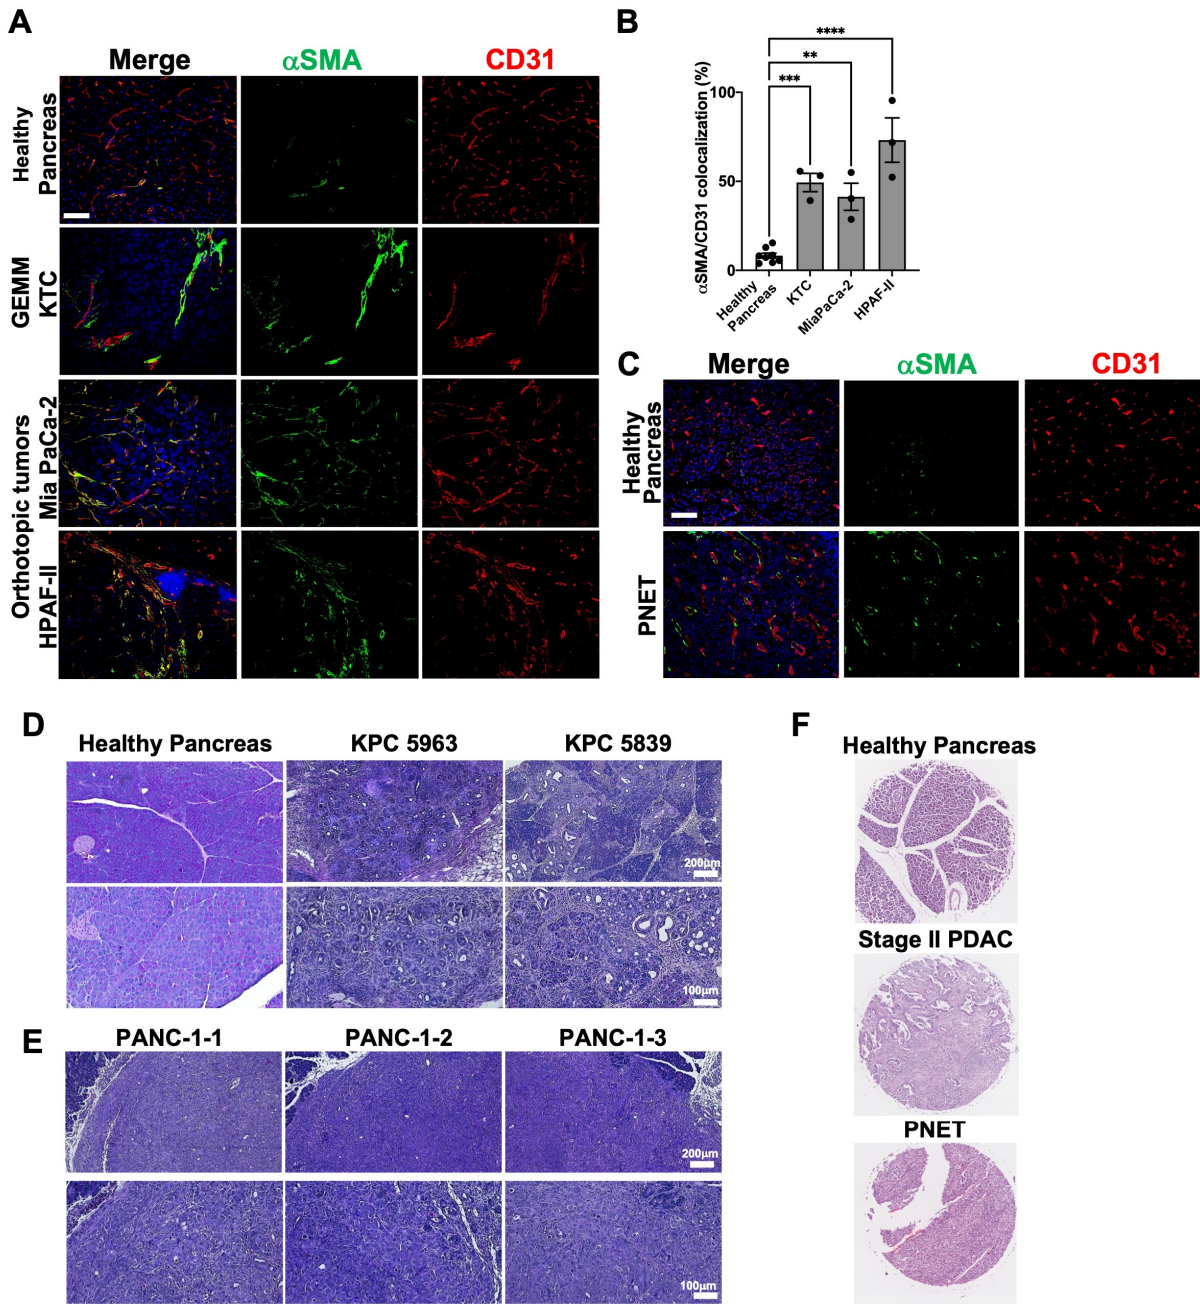

**Figure S1. PDAC associated pericytes exhibit aberrant molecular phenotype.** (A) Representative images of FFPE sections of murine PDAC tumors or healthy pancreas tissues immunolabeled for CD31 or  $\alpha$ SMA. Scale bar: 100  $\mu$ m. (B) Quantification of percentage of CD31<sup>+</sup> vessels that are associated with  $\alpha$ SMA<sup>+</sup> pericytes (Healthy pancreas; n=8, KTC, Mia PaCa-2, and HPAF-II; n=3). The data are represented as mean  $\pm$  SEM, and 1-way ANOVA with Dunnett's multiple comparisons was used to determine statistical significance. \*\*P < 0.01, \*\*\*P < 0.001, \*\*\*\*P < 0.0001. (C) Representative images of FFPE tissue microarray sections from normal human pancreas and pancreatic neuroendocrine tumors (pNET) immunolabeled for CD31 or  $\alpha$ SMA. Scale bar: 100  $\mu$ m. (D-F) Representative images of H&E staining of murine healthy pancreas tissues

and KPC tumor tissues (D), murine PANC-1 orthotopic tumor tissues (E), and normal human pancreas, PDAC, and PNET tumor tissues microarrays (F).

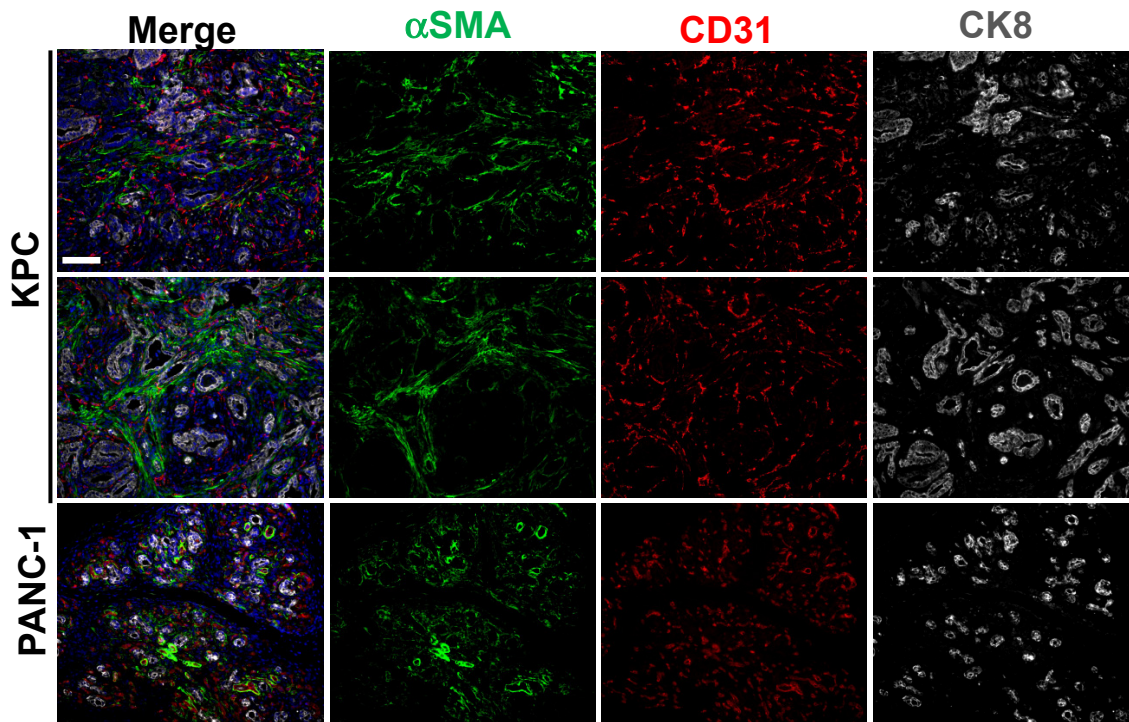

**Figure S2. Perivascular composition of PDAC tumor tissues.** Representative images of FFPE sections of KPC and PANC-1 orthotopic tumors immunolabeled for  $\alpha$ SMA, CD31, and CK8 (cancer cells). Sections are counterstained with



DAPI (blue) to visualize nuclei. Scale bar: 100  $\mu$ m.

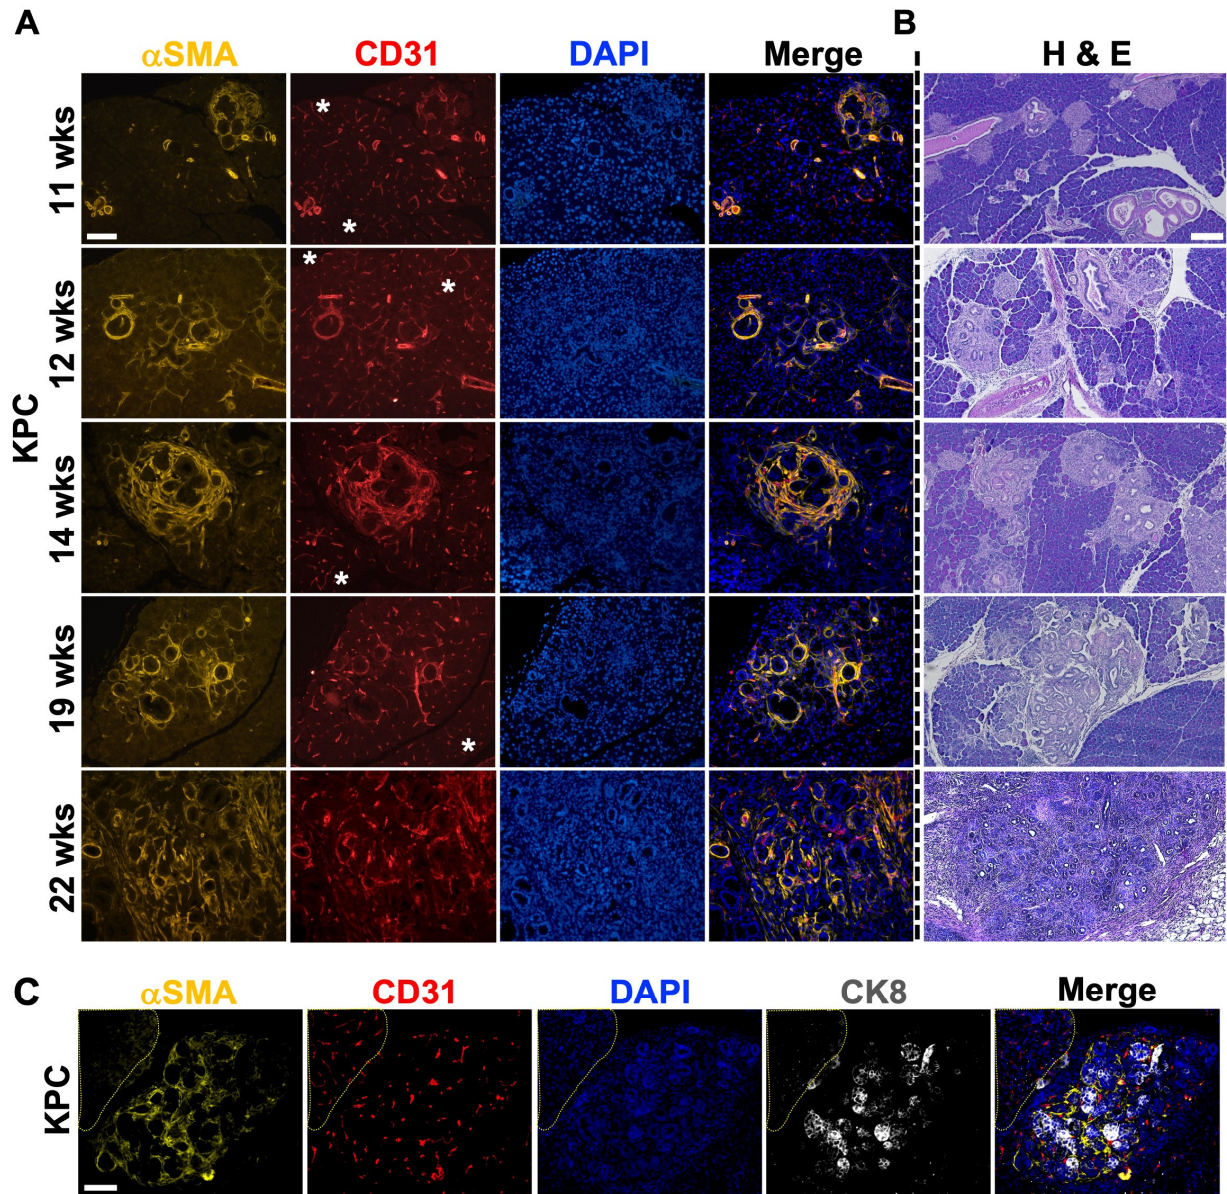

**Figure S3.**  $\alpha$ SMA<sup>+</sup> pericytes progressively appear on KPC tumors at different stages. (A) Representative images of FFPE sections of KPC tumors at different stages. Sections were immunolabeled for CD31 and  $\alpha$ SMA. Sections are counterstained with DAPI (blue) to visualize nuclei. Asterisks indicate adjacent healthy pancreatic tissues with normal vessels without  $\alpha$ SMA<sup>+</sup> pericytes coverage. Scale bar: 100  $\mu$ m for all immunostained images. (B) Representative images of H&E staining of the KPC tumors at different stages. Scale bar: 200  $\mu$ m. (C) Representative images of FFPE sections of KPC tumors immunolabeled for CD31,  $\alpha$ SMA, and CK8 (cancer cells). Sections are counterstained with DAPI (blue) to visualize nuclei. The dotted yellow line delineates adjacent normal pancreas tissue (CK9 negative) containing vessels without  $\alpha$ SMA<sup>+</sup> pericytes coverage. Scale bar: 100  $\mu$ m.

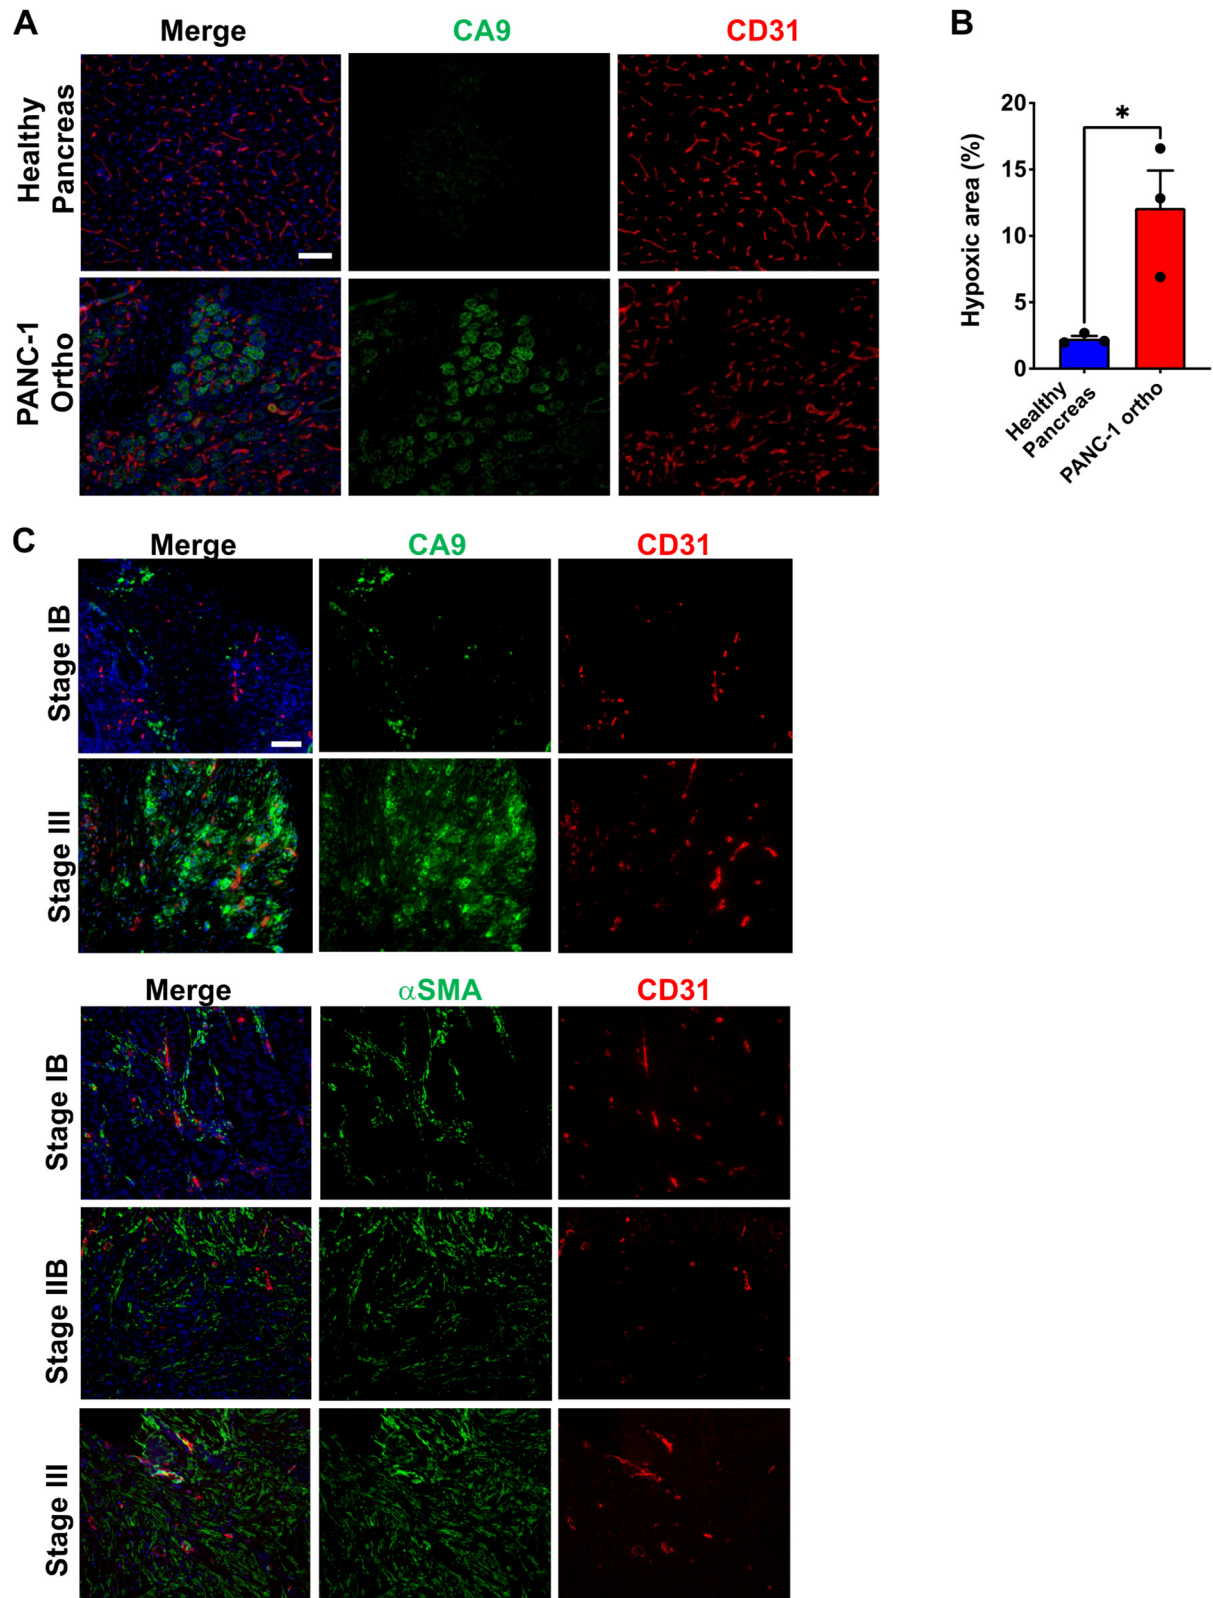

**Figure S4.**  $\alpha$ SMA<sup>+</sup> pericytes coverage is correlated with hypoxia in PDAC tumors. (A) Representative images of FFPE sections of PANC-1 orthotopic tumors and healthy pancreas. Sections were immunolabeled for CA9 and CD31. Scale bar: 100  $\mu$ m (B) Quantification of percentage of hypoxic area (CA9<sup>+</sup> area per image) (n = 3, all groups). Unpaired 2-tailed t test was used to determine statistical significance. \*P < 0.05 (C) Representative images of human PDAC tumors at different stages immunolabeled for CD31,  $\alpha$ SMA, or CA9. Scale bar: 100  $\mu$ m.



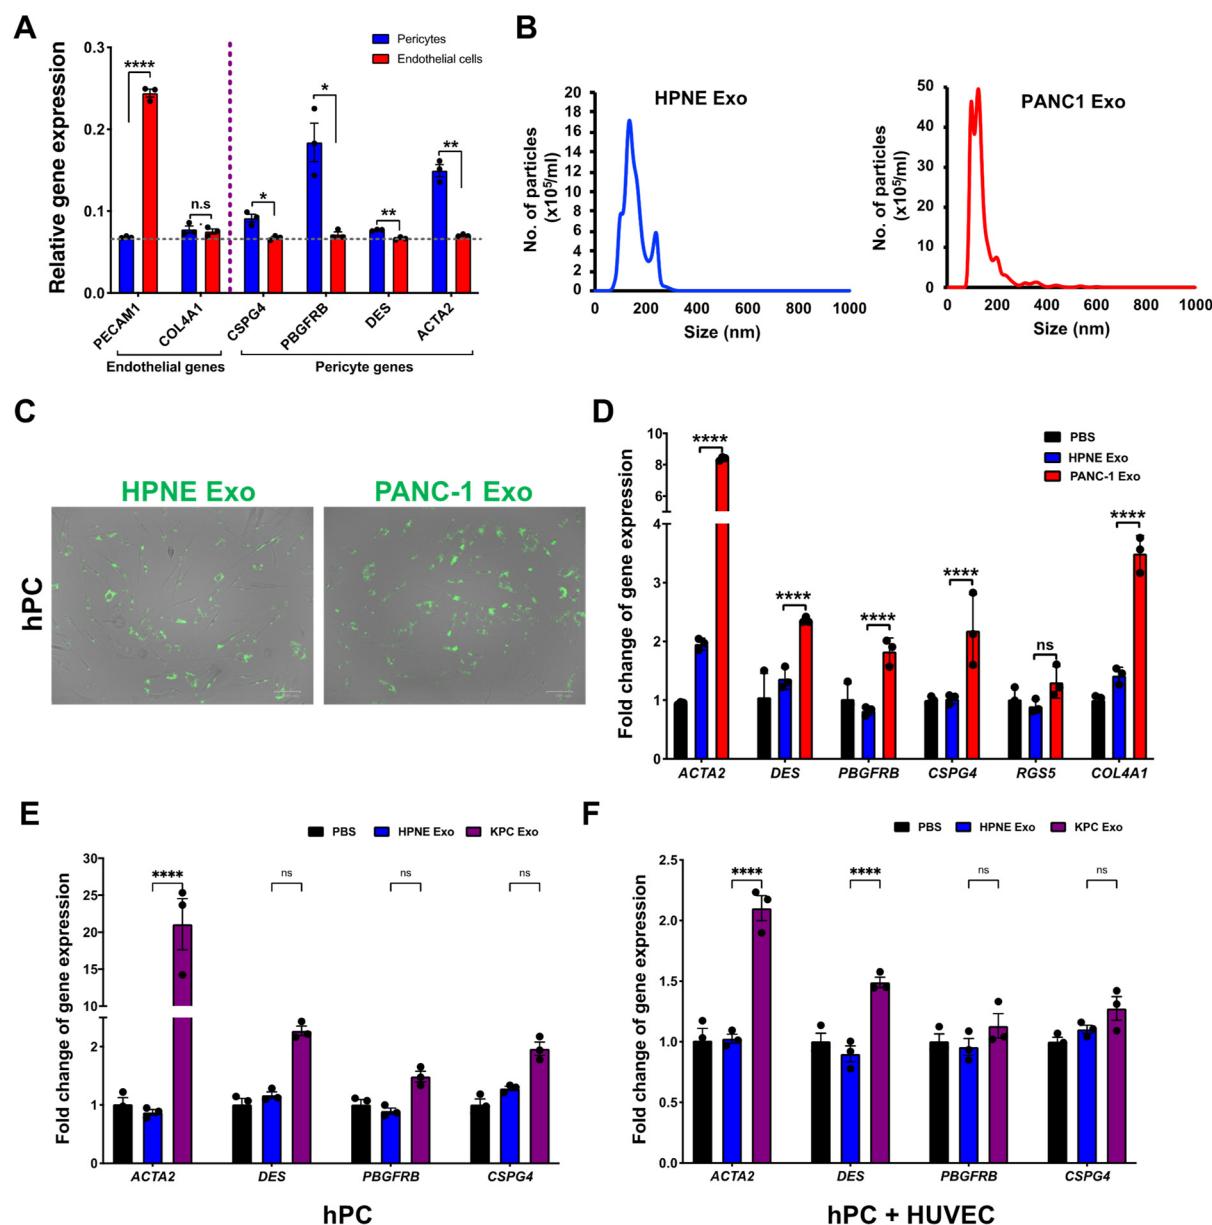

**Figure S5.** Pericytes phenotype is influenced by pancreatic cancer cell-derived exosomes. (A) Basal level gene expression of vascular cells. hPC and hEC were cultured in their optimal culture condition and gene expression was measured by qRT-PCR. Relative expression level was compared between hPC and hEC for each gene and statistical significance was determined by multiple unpaired t-test. (B) Exosome size and concentration distribution were measured using nanoparticle tracking analysis (NanoSight NS300). (C) Representative images of pericyte treated with DiO'; DiOC18(3) labeled exosomes. Bright field images to visualize the cells and green fluorescence images to visualize exosomes were superimposed. (D) hPC was treated with PBS, HPNE Exo, or PANC-1 Exo. Common pericytes marker expression was quantified by qRT-PCR. (E) Either hPC only or (F) hPC + hEC co-culture were treated with PBS, HPNE Exo, or KPC Exo. Quantification of pericyte marker gene expression in each condition. Unless otherwise stated, 2-way ANOVA with Tukey's multiple comparisons test was used to determine statistical significance and the data are represented as mean  $\pm$  SEM. \* $P < 0.05$ , \*\* $P < 0.01$ , \*\*\* $P < 0.001$ , \*\*\*\* $P < 0.0001$ , ns = not significant.

**Table S1.** Primer sequences used for qRT-PCR.

| Gene          |         | Sequences (5'-3')      | Gene           |         | Sequences (5'-3')        |
|---------------|---------|------------------------|----------------|---------|--------------------------|
| <b>ACTA2</b>  | Forward | CTTCCCTGAACACCACCCAGTG | <b>VCAM1</b>   | Forward | GGGAAGATGGTCGTGATCCTT    |
|               | Reverse | CATCGTCCCCAGCAAAGCCG   |                | Reverse | TCTGGGGTGGTCTCGATTTTA    |
| <b>PBGFRB</b> | Forward | AGCACCTTCGTTCTGACCTG   | <b>SELE</b>    | Forward | AGAGTGGAGCCTGGTCTTACA    |
|               | Reverse | TATTCTCCCGTGCTAGCCCA   |                | Reverse | CCTTTGCTGACAATAAGCACTGG  |
| <b>COL4A1</b> | Forward | GGACTACCTGGAACAAAAGGG  | <b>SELP</b>    | Forward | ACTGCCAGAATCGCTACACAG    |
|               | Reverse | GCCAAGTATCTCACCTGGATCA |                | Reverse | CACCCATGTCCATGTCTTATTGT  |
| <b>CSPG4</b>  | Forward | CTTTGACCCTGACTATGTTGGC | <b>CD80</b>    | Forward | AAACTCGCATCTACTGGCAA     |
|               | Reverse | TGCAGGCGTCCAGAGTAGA    |                | Reverse | GGTCTTGTACTCGGGCCATA     |
| <b>DES</b>    | Forward | TCGGCTCTAAGGGCTCCTC    | <b>CD86</b>    | Forward | CTGCTCATCTATACACGGTTACC  |
|               | Reverse | CGTGGTCAGAACTCCTGGTT   |                | Reverse | GGAAACGTCGTACAGTTCTGTG   |
| <b>PECAM1</b> | Forward | AACAGTGTGACATGAAGAGCC  | <b>HLA-DRA</b> | Forward | TTTCCGCAAGTTCCACTATCTCCC |
|               | Reverse | TGTA AACAGCACGTCATCCTT |                | Reverse | AATAATGATGCCACCAGACCCAC  |
| <b>RGS5</b>   | Forward | CTTGCAGCTTTGCCCCACTC   | <b>HLA-A</b>   | Forward | CGACGCCGCGAGCCAGA        |
|               | Reverse | TCTTGGCTGGTTTCTCTGGCT  |                | Reverse | GCGATGTAATCCTTGCCGTCGTAG |
| <b>ANGPT2</b> | Forward | ATCAGGACACACCACGAATG   | <b>CD274</b>   | Forward | TGGCATTGCTGAACGCATTT     |
|               | Reverse | CATCCTCACGTCGCTGAATAA  |                | Reverse | TGCAGCCAGGTCTAATTGTTTT   |
| <b>ICAM1</b>  | Forward | ATGCCCAGACATCTGTGTCC   | <b>GAPDH</b>   | Forward | GGTGTGAACCATGAGAAGTATGA  |
|               | Reverse | GGGGTCTCTATGCCCAACAA   |                | Reverse | GAGTCCTTCCACGATACCAAAG   |
